# Supplementary material for: Chondrogenesis and osteogenesis are one continuous developmental and lineage defined biological process
Source: PubMed Central journal article supplement (PMC5577112; doi:10.1038/s41598-017-10048-z), 2017-08-30

**Chondrogenesis and osteogenesis are one continuous developmental and lineage defined biological process**

Yan Jing<sup>1\*</sup>, Junjun Jing<sup>2</sup>, Ling Ye<sup>2</sup>, Xiaohua Liu<sup>2</sup>, Stephen E. Harris<sup>3</sup>, Robert J. Hinton<sup>2</sup>, Jian Q. Feng<sup>2\*</sup>

## SUPPLEMENTAL INFORMATION

**Fig. S1. Removal of *Bmpr1a* in chondrocytes by crossing *Bmpr1a*<sup>fllox</sup> and *Acan-Cre*<sup>ERT2</sup> with one time injection of tamoxifen at age of postnatal day 3 (P3) leads to a lack of bone growth plus a malformed skeleton.**

(A) Representative radiographic images showed a cessation of long bone growth at both stages: 1-month and 5-months. Of note, there was a bony protrusion at the knee joint in the cKO mice.

(B) Alizarin red/Alcian blue staining of the control (cont, *left*) and the cKO whole skeleton (*right*) at age of one month is shown, in which the bone was retarded in the cKO epiphysis.

**Fig. S2. *Bmpr1a* is essential for postnatal limb development.**

Use of Toluidine blue/H&E staining shows a dramatic decrease of metaphyseal bone formation at P10 (7 days after tamoxifen injection) in the *Acan-Cre*<sup>ERT2</sup>; *Bmpr1a* cKO mice.

**Fig. S3. Cell lineage tracing shows distinct responses in different regions in *Bmpr1a* cKO mice: a lack of maturation in chondrocyte-derived bone cells in the epiphysis and a complete cessation of cell transformation in the metaphysis.**

(A) The merged P14 confocal images, in which red bone cells were derived from chondrocytes and the green matrix was IHC staining using anti-Col II antibody, revealed red osteocyte (Ocy)-like cells in the secondary ossification center with red osteoblast (Ob) cells on the bone surface (*upper left*). In the cKO epiphysis, there were numerous red immature Ocy-like cells trapped in the HC lacunae (*upper right*, arrows), and few red Obs on the bone surface, indicating a critical role for *Bmpr1a* in regulating

bone cell maturation after cell transformation. In the control metaphysis, red bone cells filled the bone column under the growth plate (*lower left*). In the cKO, there were essentially no HC cells in the GP nor bone cells in the metaphysis (*lower right*), supporting the notion that *Bmpr1a* is essential for chondrocyte maturation in metaphysis.

(B) The merged P28 confocal image showed a well-formed epiphysis in which red bone cells were observed in subchondral bone with cartilage residues stained with Col II IHC (*upper left*). In the cKO epiphysis, there was a lot of articular cartilage stained with Col II but few mature bone cells and a lack of cartilage residues (*upper right*). In the control metaphysis, the red bone cells filled the bone column (*lower left*). In the cKO, there was no metaphyseal bone (*lower right*). Taken together, the above time-line data suggest that *Bmpr1a* is indispensable for control of chondrocyte-derived bone cell maturation.

**Fig. S4. The cartilage residues are dramatically decreased in *Bmpr1a* cKO cortical bone in development stage.**

Col II IHC staining showed that there were many red chondrocyte-derived bone cells in the cortical bone surrounding Col II<sup>+</sup> cartilage residues in the P14 and P28 control mice. The thickness of cortical bone, the number of red chondrocyte-derived bone cells and the strength of Col II IHC were all sharply reduced both age groups of cKO mice.

**Fig. S5. Cartilage residues are present in the cortical bone of adult wild type mice but residues are largely undetectable in age-matched *Bmpr1a* cKO cortical bone.**

(A) Backscattered SEM images obtained from the 2-month-old tibias showed cartilage residues in the control mouse (*left*, white color), whereas cartilage residues were not

detectable in the cKO mouse line: *Acan-Cre*<sup>ERT2</sup>; *Bmpr1a*<sup>flox/+</sup>; *R26R*<sup>Tomato</sup> (tamoxifen/harvest time at P3/P60).

(B) Col II IHC revealed Col II signal (green) in the control tibia cortical bone (*left*) but not in *Bmpr1a* cKO (tamoxifen/harvest time at P3/P60).

**Fig. S6. Removal of *Bmpr1a* by *Acan-Cre*<sup>ERT2</sup> leads to reductions in SOX9 and OSX in the null chondrocytes**

(A) Col II IHC signal in the *Bmpr1a* cKO matrix is similar to that in the control.

(B) SOX9 IHC showed a strong signal in GP (growth plate) chondrocyte nuclei in the control mice but very weak in the *Bmpr1a* cKO mice.

(C) OSX expression was present in the control but was largely undetectable in the *Bmpr1a* cKO mice.

**Fig S1**

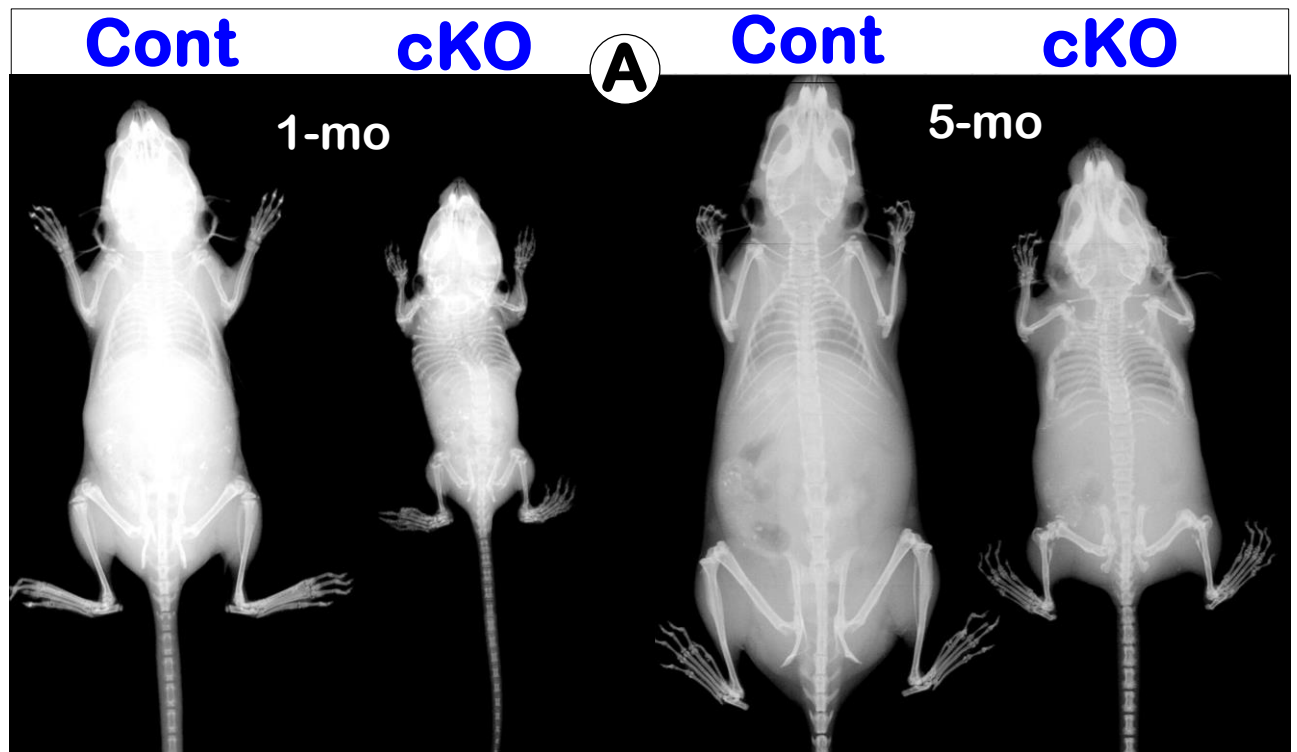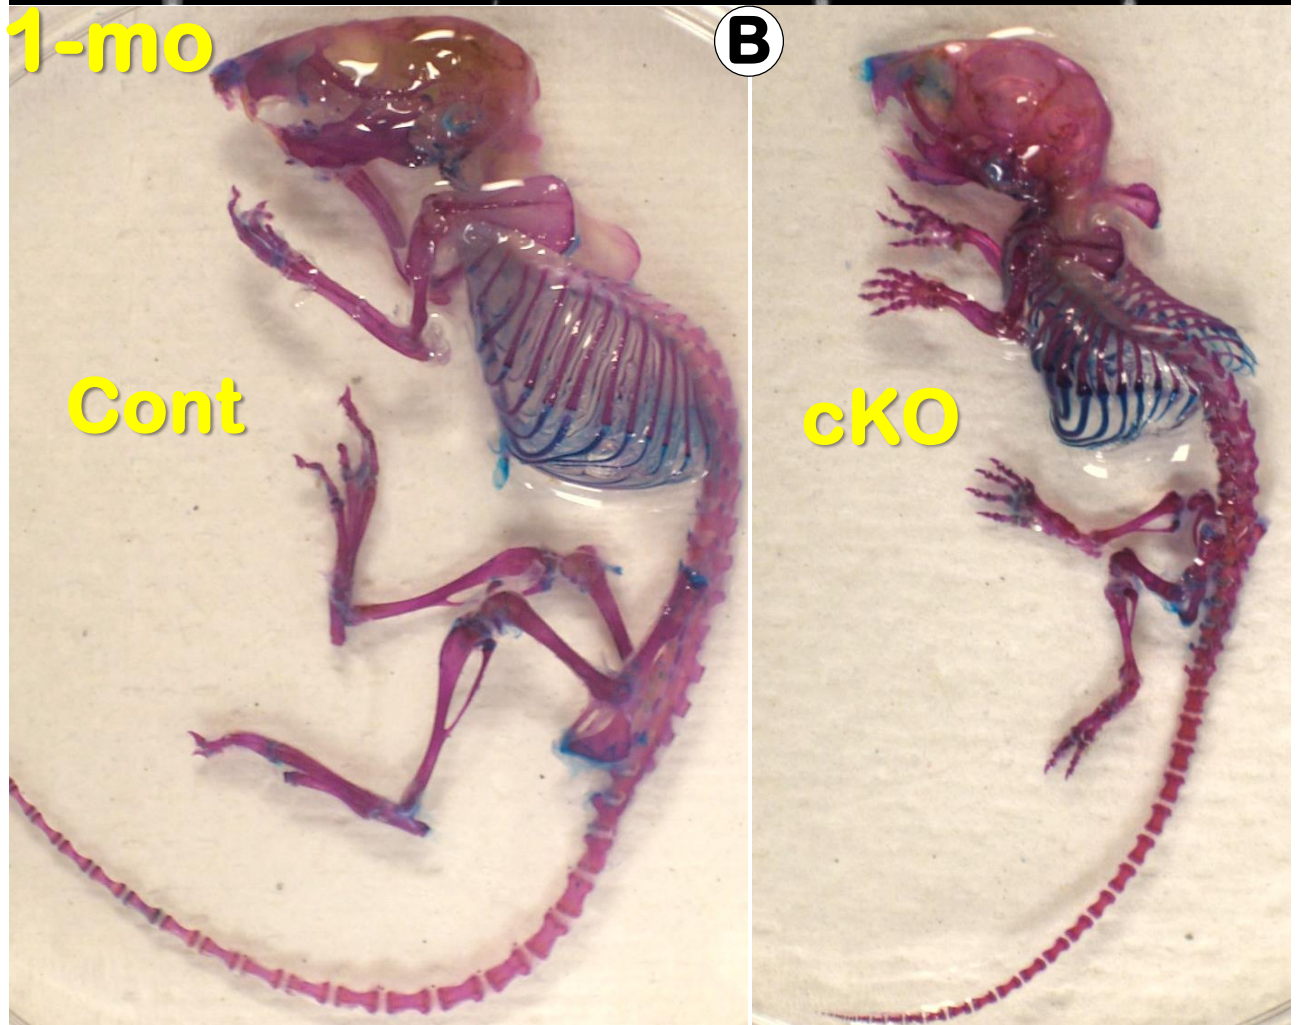

**Fig S2**

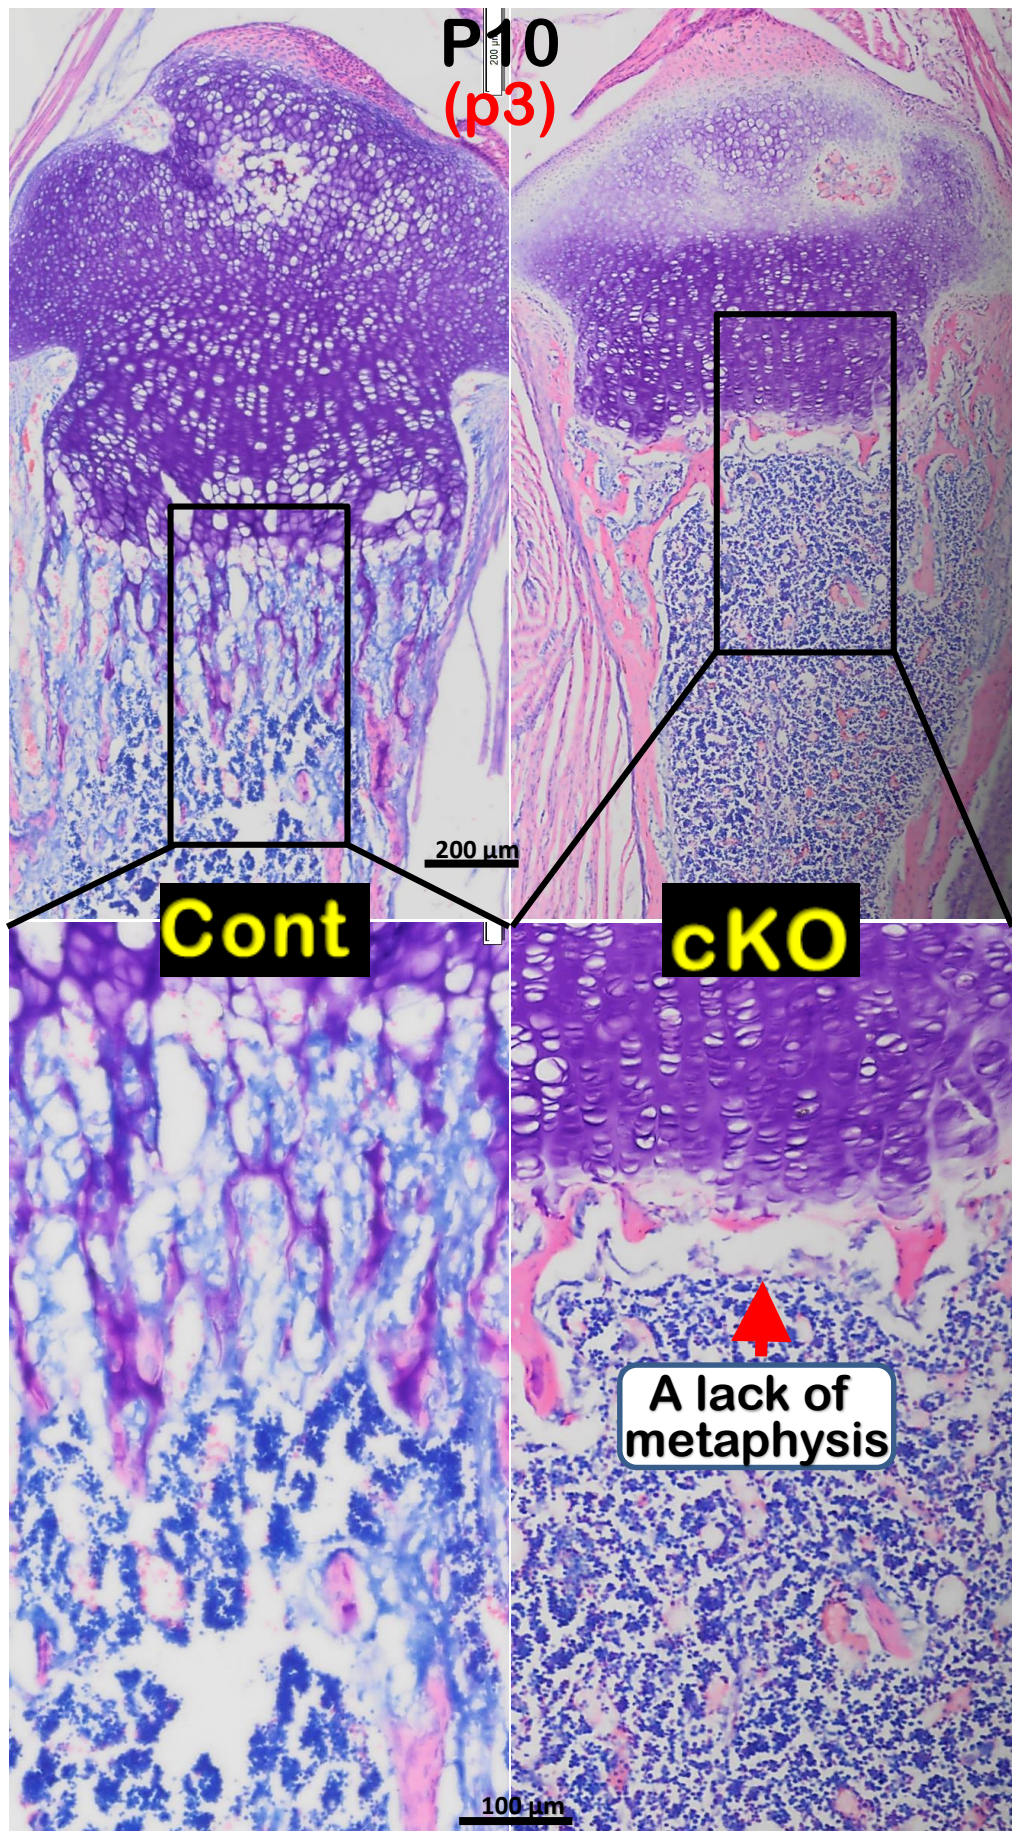

**Fig S3**

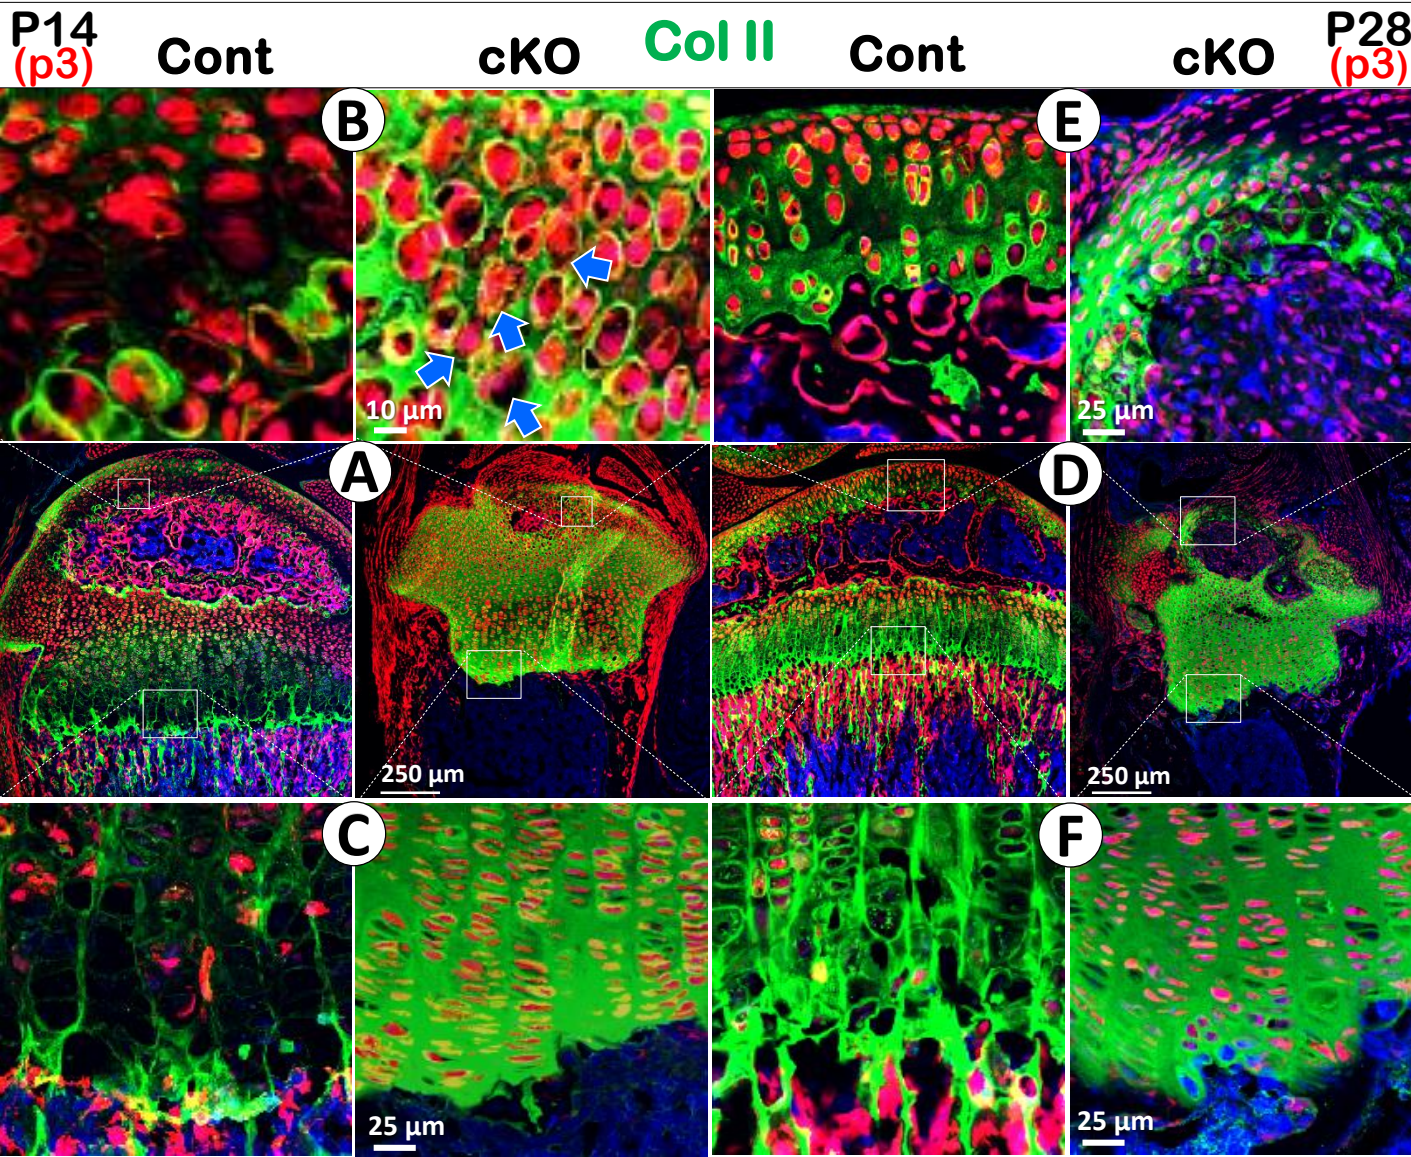

**Fig S4**

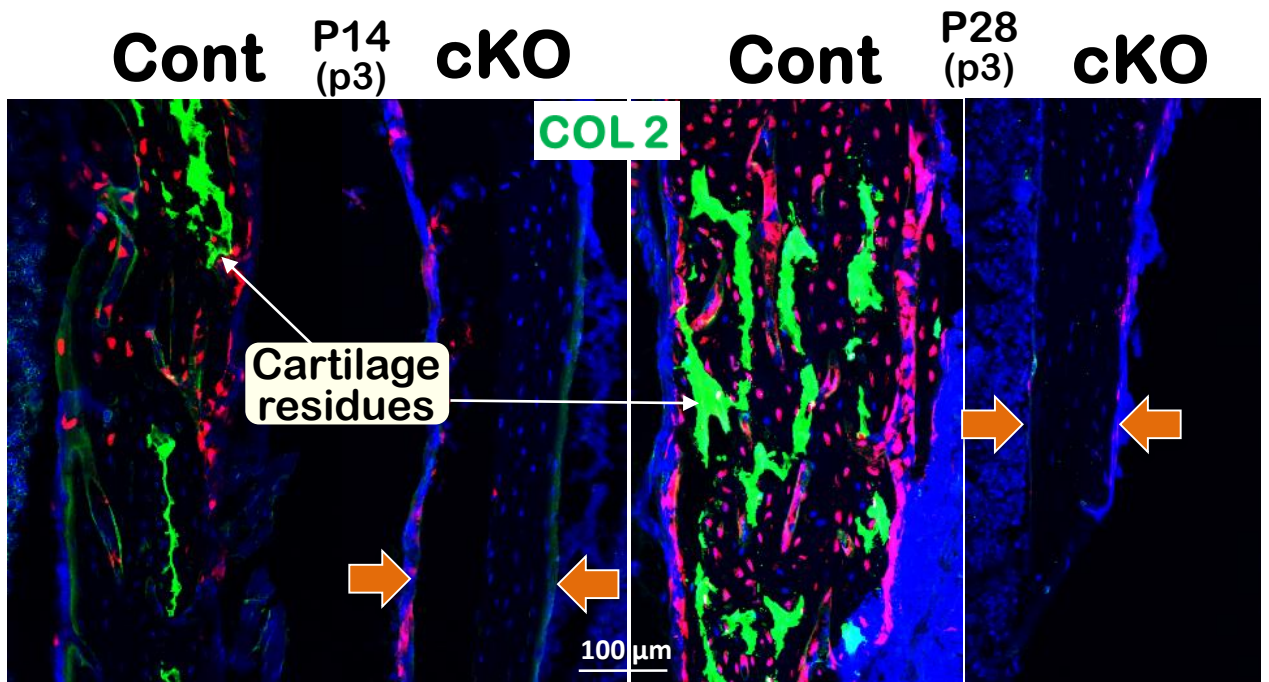



Fig S5

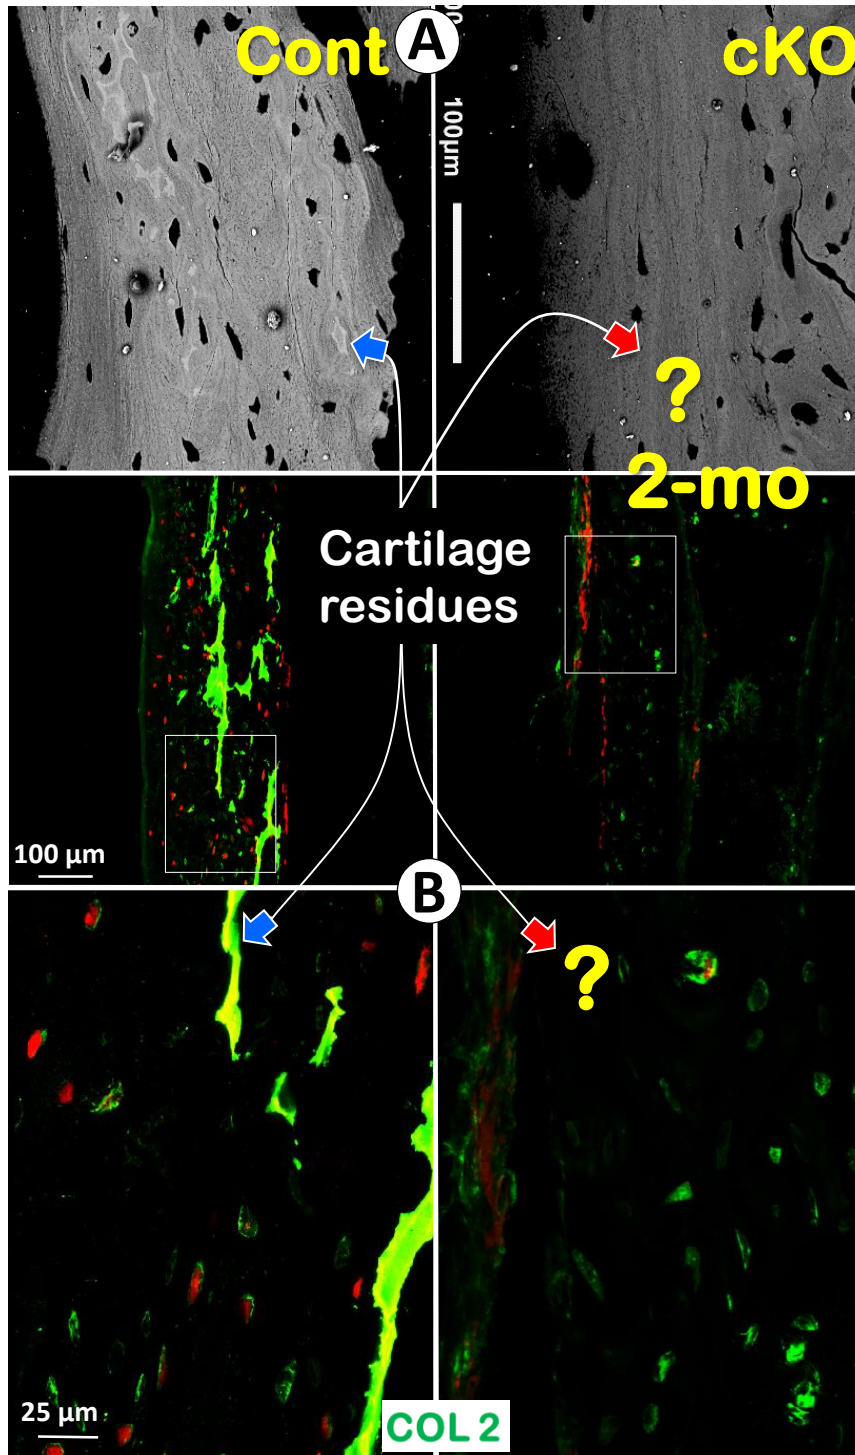

Fig S6

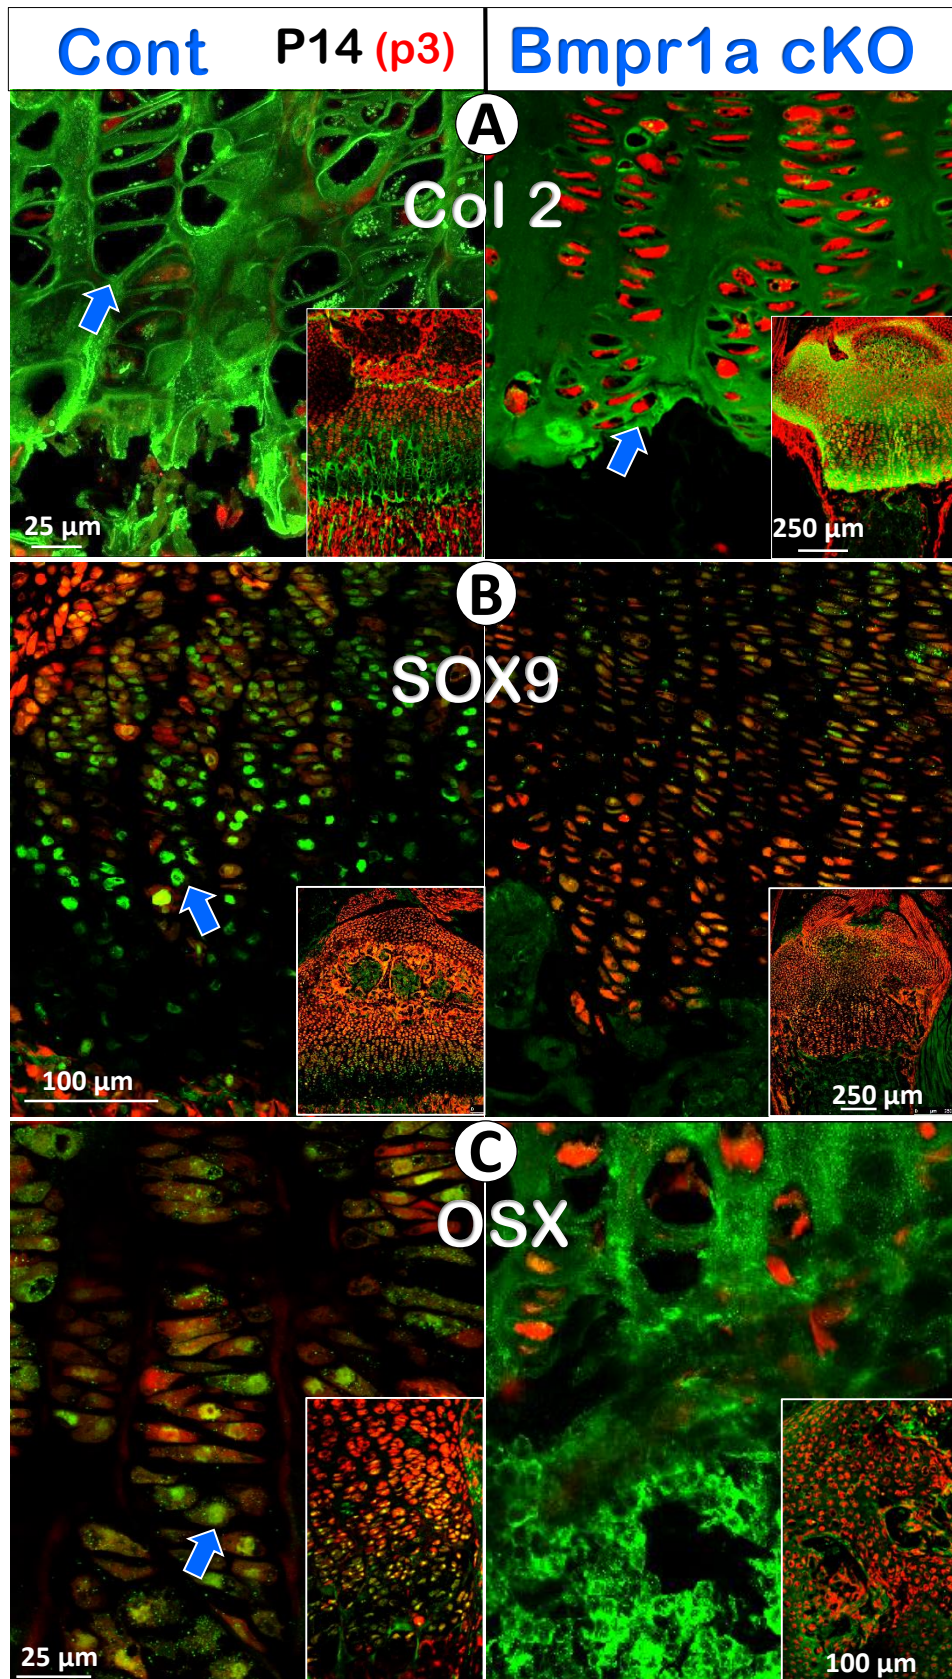

Supplement: 41598_2017_10048_MOESM1_ESM.pdf [file 41598_2017_10048_MOESM1_ESM.pdf]
